# Supplementary material for: Integrating human and ecological dimensions: The importance of stakeholders’ perceptions and participation on the performance of fisheries co-management in Chile
Source: PLOS journal article supplement (doi:10.1371/journal.pone.0254727), 2021-08-11
Supplement: S10 (10.1371/journal.pone.0254727.s010) [file journal.pone.0254727.s010]

## S3 Appendix. Questionnaire for non-fishers (decision-makers, academics and consultants)

### BLOCK 1

Age: \_\_\_\_\_

Sex: Male \_\_\_\_\_ Female \_\_\_\_\_

Role: \_\_\_\_\_

You belong to: \_\_\_\_\_ (academy, government, private sector, others)

### BLOCK 2

Indicate how each of the following ecological-fishery and human components is currently affecting the future of MEABR in Biobio Region, Chile. With value zero (0) are the worst scenario and ten (10) the best-case scenario (mark with an X your answer).

|               |                                                                                                               | unfavorable |   |   |   | regular |   |   | very favorable |   |   |    |
|---------------|---------------------------------------------------------------------------------------------------------------|-------------|---|---|---|---------|---|---|----------------|---|---|----|
|               |                                                                                                               | 0           | 1 | 2 | 3 | 4       | 5 | 6 | 7              | 8 | 9 | 10 |
| Technological | 1. Fleet capacity evolution (number of boats and divers) into MEABRs of the region, compared to 10 years ago. |             |   |   |   |         |   |   |                |   |   |    |
|               | 2. Length and tonnage in GRT <sup>1</sup> of the vessel participating in the MEABR compared to 10 years ago.  |             |   |   |   |         |   |   |                |   |   |    |
|               | 3. The use of new fishing gear in the management area in the last ten years.                                  |             |   |   |   |         |   |   |                |   |   |    |
|               | 4. The distance (km or miles) traveled, the time (hours) it takes for the boat to reach the MEABR.            |             |   |   |   |         |   |   |                |   |   |    |
|               | 5. Reduction in harvest intensity (harvest/total number of divers) in the MEABR.                              |             |   |   |   |         |   |   |                |   |   |    |
|               | 6. The surveillance system is applied in the management area to minimize poaching.                            |             |   |   |   |         |   |   |                |   |   |    |
|               | 7. Other activities that have side effects on the MEABR.                                                      |             |   |   |   |         |   |   |                |   |   |    |
| Economic      | 1. Harvest proportion used concerning authorized quotas for species harvested in MEABR.                       |             |   |   |   |         |   |   |                |   |   |    |
|               | 2. Expenses generated by the fishing activity during the "harvest season" that influence the cost.            |             |   |   |   |         |   |   |                |   |   |    |
|               | 3. Harvest profits evolution compared to 10 years ago.                                                        |             |   |   |   |         |   |   |                |   |   |    |
|               | 4. The income generated by harvesting during the last ten years, compared to other activities.                |             |   |   |   |         |   |   |                |   |   |    |
|               | 5. The profits distribution between the shipowner and other participants in the harvest season.               |             |   |   |   |         |   |   |                |   |   |    |
|               | 6. Income from other activities.                                                                              |             |   |   |   |         |   |   |                |   |   |    |
|               | 7. Subsidies received and the purpose for which they used during the last ten years.                          |             |   |   |   |         |   |   |                |   |   |    |
|               | 8. The fisher organization's capacity in response to debts owed to financial institutions and other entities. |             |   |   |   |         |   |   |                |   |   |    |
|               | 9. The total income of fisher in respect to minimum wage (\$301,000).                                         |             |   |   |   |         |   |   |                |   |   |    |
|               | 10. The extent of sales of harvested species from the MEABR, where the product goes to.                       |             |   |   |   |         |   |   |                |   |   |    |
| Institutional | 1. Policy presence and advising with MEABR activities.                                                        |             |   |   |   |         |   |   |                |   |   |    |
|               | 2. Current collaboration in the right management as scientists, politicians, and fishers.                     |             |   |   |   |         |   |   |                |   |   |    |
|               | 3. Sanctions applied inside the fisher organization.                                                          |             |   |   |   |         |   |   |                |   |   |    |
|               | 4. Mechanisms to resolve conflicts with external agents: AFOs <sup>2</sup> , institutions, or others.         |             |   |   |   |         |   |   |                |   |   |    |
|               | 5. Networks that the fisher organization has with institutions to obtain benefits.                            |             |   |   |   |         |   |   |                |   |   |    |
|               | 6. Networks generated between fisher organizations to commercial strategies and surveillance of MEABRs.       |             |   |   |   |         |   |   |                |   |   |    |
|               | 7. Fulfillment of objectives associated with the work plans by fisher organizations.                          |             |   |   |   |         |   |   |                |   |   |    |
|               | 8. The number of projects linked to the development of MEABR.                                                 |             |   |   |   |         |   |   |                |   |   |    |

1) GRT=gross registered tonnage; 2) AFOs= artisanal fisher organizations

[illegible]

### BLOCK 3

Indicate the importance of the following ecological-fishery and human components for the state of MEABR in Biobio Region, Chile. With value zero (0) are indicating less important and ten (10) very important (Mark with an X your answer).

[illegible]

[illegible]
